# Supplementary material for: Thiphenylmethane based structural fragments as building blocks towards solution-processable heteroleptic iridium(iii) complexes for OLED use
Source: Royal Society of Chemistry journal article supplement (doi:10.1039/c8nj04484h), 2018-11-12

## Supplementary Information

### Thiophenylmethane based structural fragments as building blocks towards solution-processable heteroleptic iridium (III) complexes for OLED use

Kaspars Traskovskis,<sup>\*a</sup> Armands Ruduss,<sup>a</sup> Valdis Kokars,<sup>a</sup> Igors Mihailovs,<sup>a,b</sup>

Natalija Lesina,<sup>b</sup> Aivars Vembris<sup>b</sup>

<sup>a</sup> Riga Technical University, Faculty of Materials Science and Applied Chemistry, 3/7 Paula Valdena Street, Riga LV-1048, Latvia

<sup>b</sup> Institute of Solid State Physics, University of Latvia, 8 Kengaraga Street, Riga LV-1063, Latvia

\* Corresponding author. E-mail: kaspars.traskovskis@rtu.lv; Tel: +371 29148070.

**Fig. S1.** <sup>1</sup>H NMR spectra of the novel iridium (III) complexes. If further unspecified, the signals marked with symbol “\*” are attributed to the solvent traces, left after the workup.

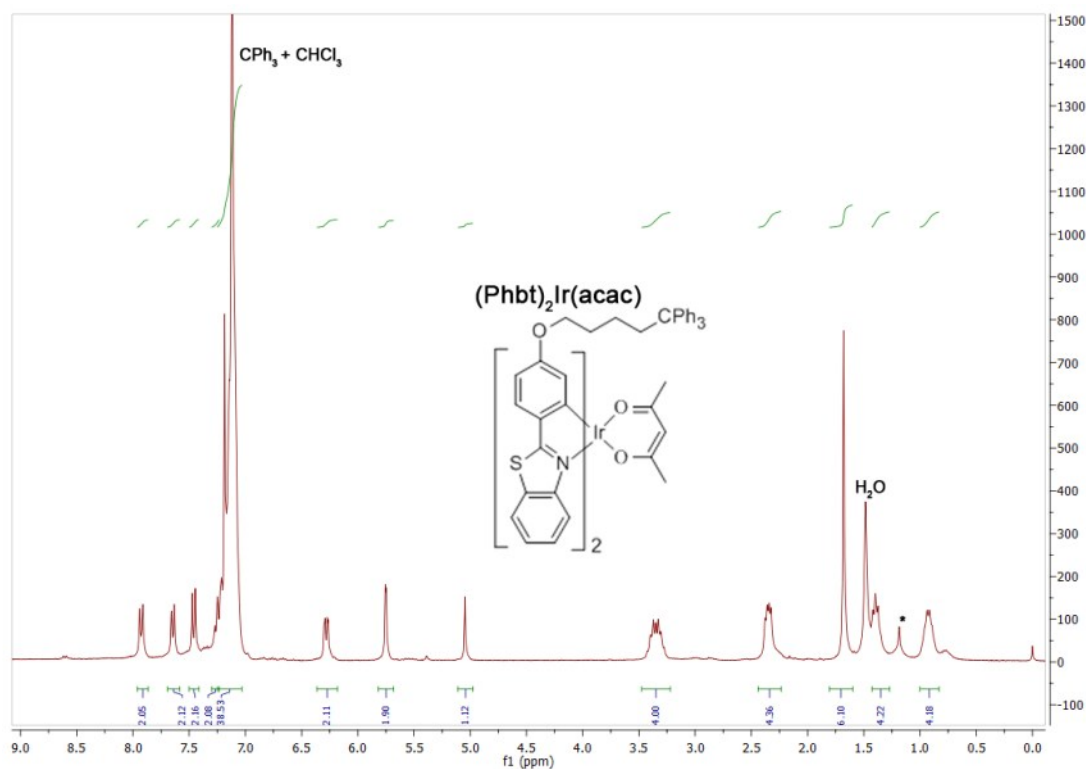

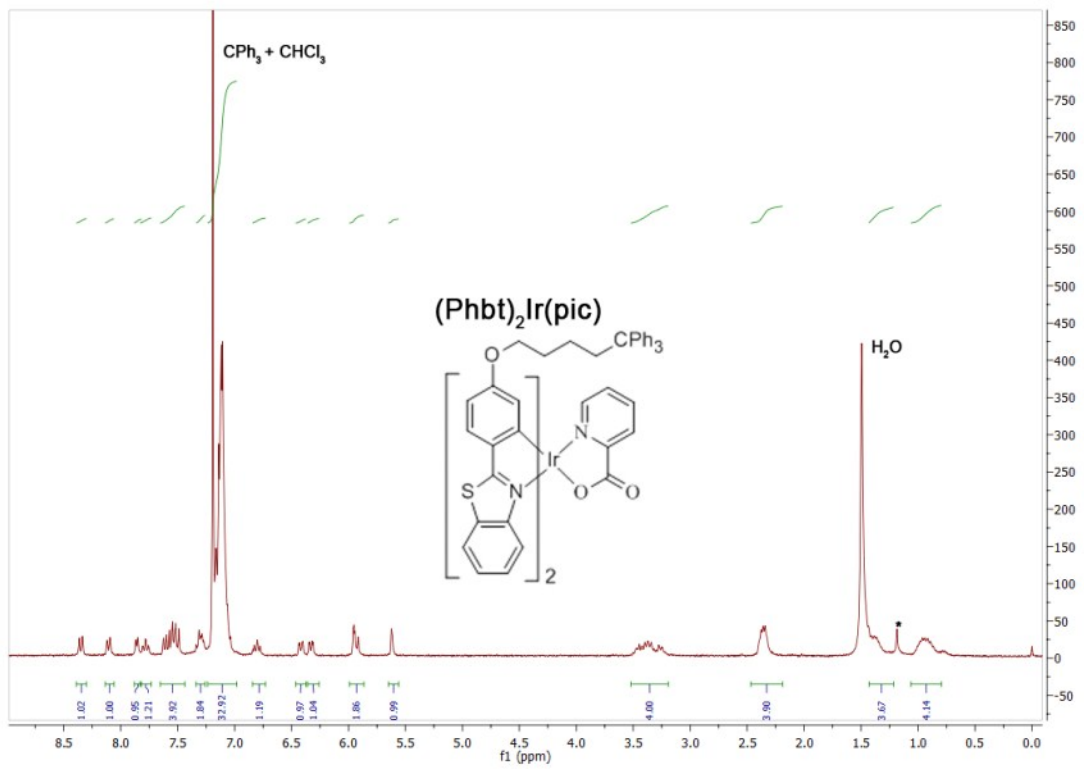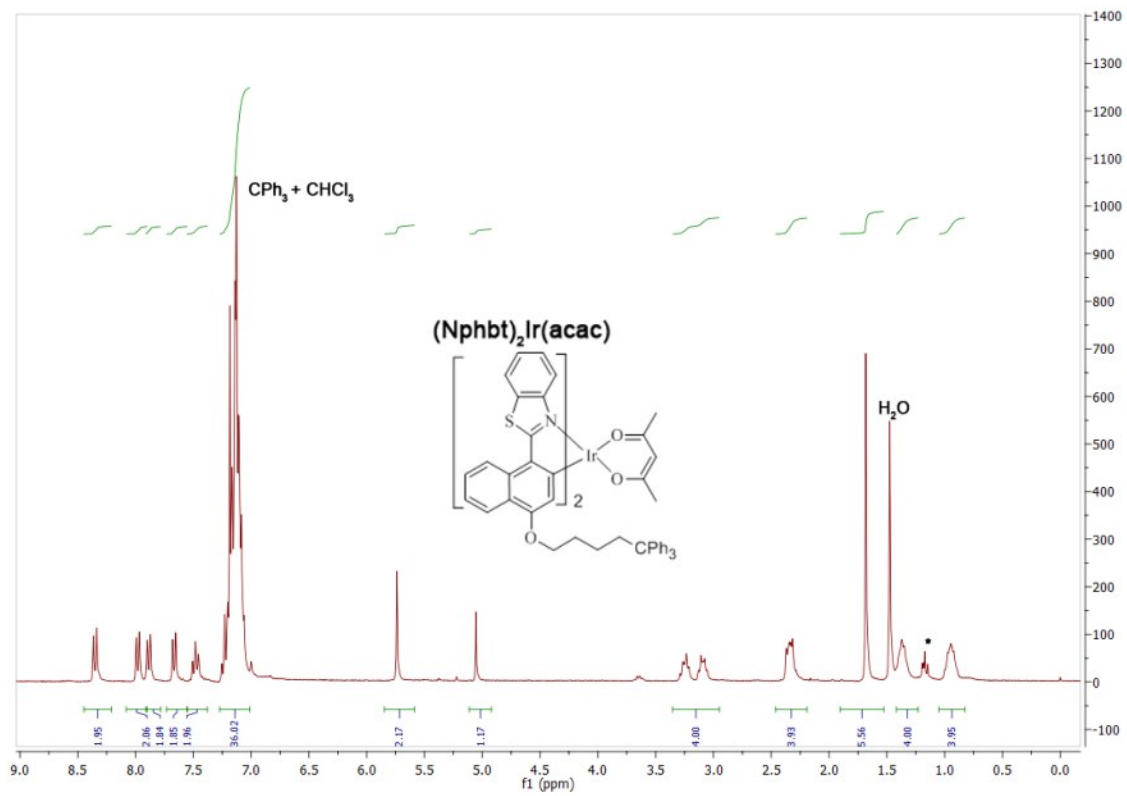

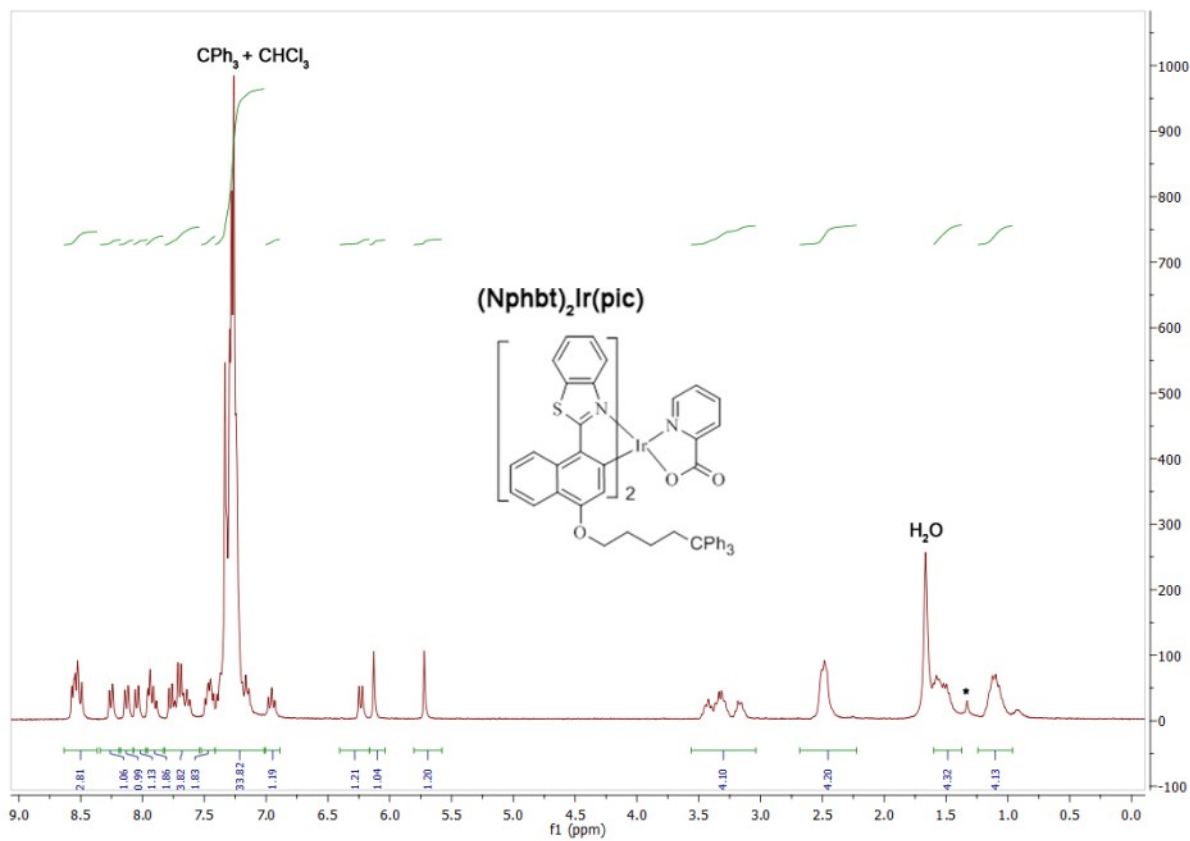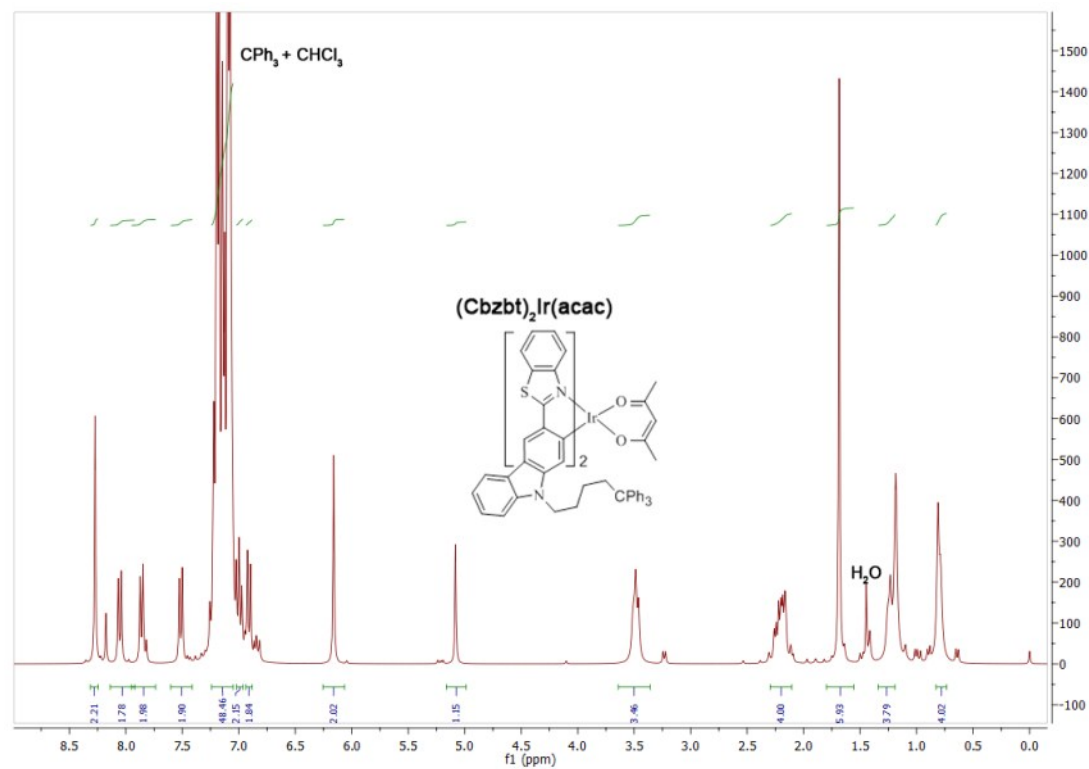

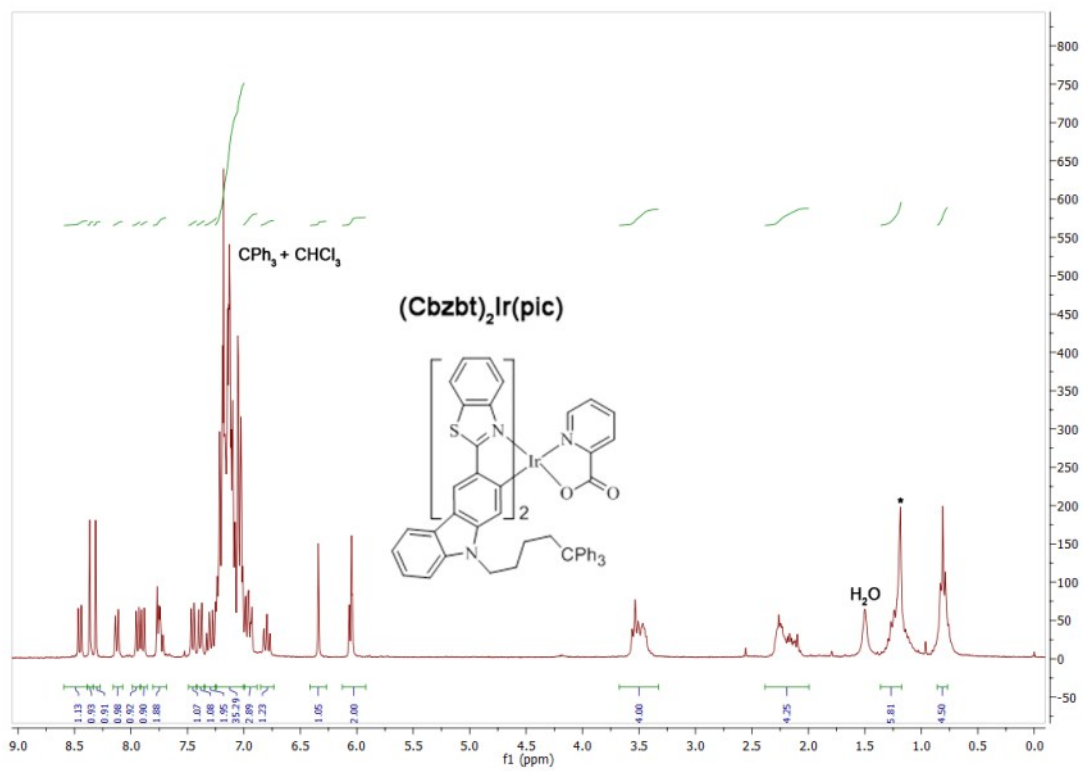

**Fig. S2.** EL spectral changes of the prepared OLEDs depending on the applied voltage.

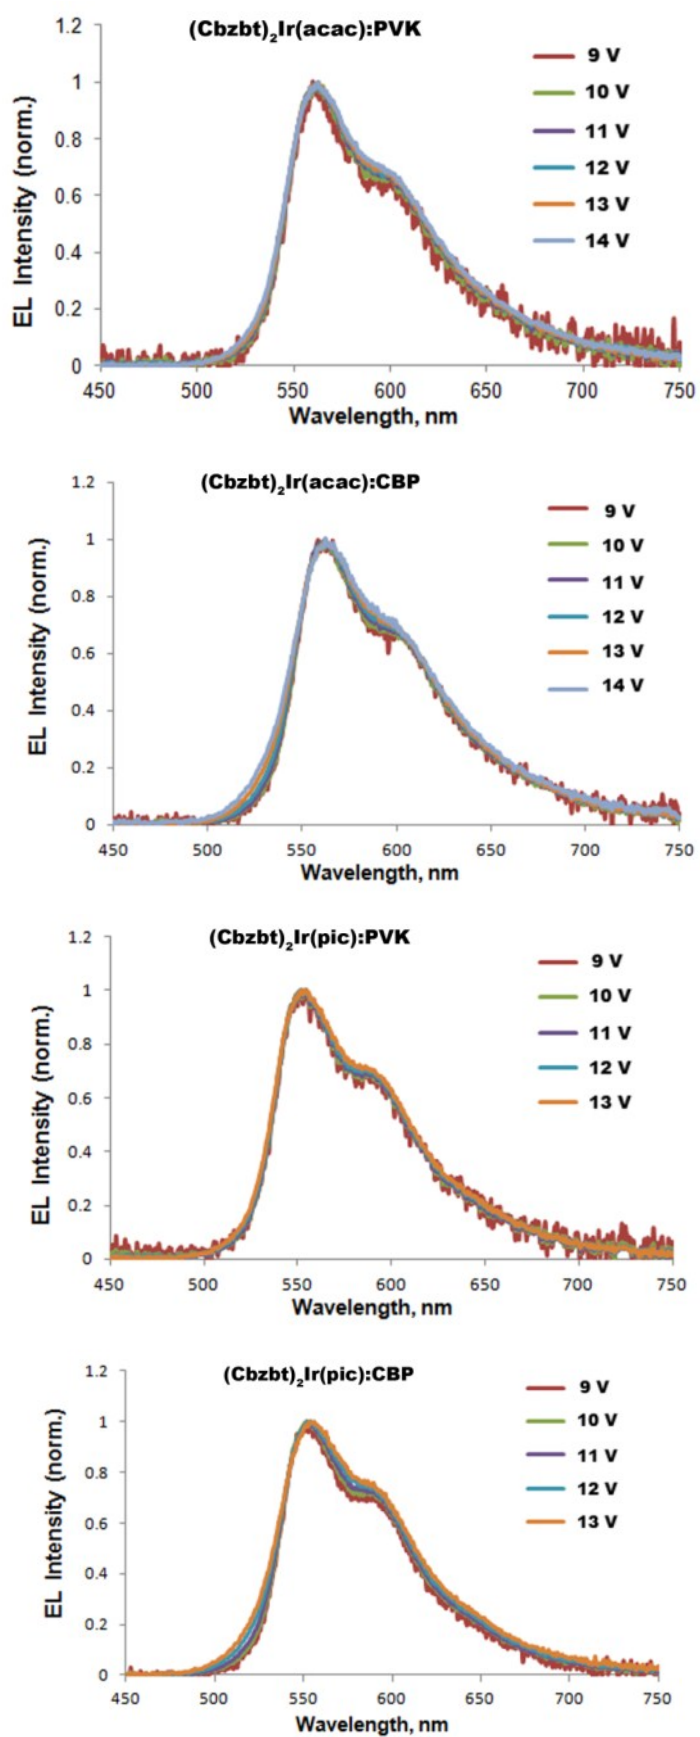

Supplement: c8nj04484h1.pdf [file c8nj04484h1.pdf]
